# Supplementary material for: The Amharic version Infant-Toddler Home Observation for Measurement of the Environment (IT-HOME) tool validation
Source: Research Square preprint supplement (doi:10.21203/rs.3.rs-7426769/v1), 2025-12-19
Supplement: Supplementary file 3 [file 8f344db2d94353213607dd46.docx]

**Annex I**

**Table 1: Expert review result**

| **Original** | **Reviewed** | |
| --- | --- | --- |
| Parent initiates verbal exchanges with visitor |  | Parent initiates verbal exchanges with visitor |
| Parent converses freely and easily |  | Parent converses freely and easily |
| Parent permits child to engage in “messy” play |  | Parent permits child to engage in “messy” play |
| Parent’s voice conveys positive feelings toward child |  | Parent’s voice conveys positive feelings toward child |
| Parent responds positively to praise of child offered by visitor |  | Parent responds positively to praise of child offered by visitor |
| Push or pull toy available |  | Push or pull toy available |
| Parent provides toys for child during visit |  | Parent provides toys for child |
| Complex eye-hand coordination toys (those permitting combination) |  | Complex eye-hand coordination toys (those permitting combination) |
| Toys for literature and music (at least 2 toys) |  | Toys for literature and music |
| Parent consciously encourages developmental advance |  | Parent consciously encourages developmental advance |
| Parent neither slaps nor spanks child during visit |  | Parent neither slaps nor spanks child |
| No more than one instance of physical punishment during past week |  | No more than one instance of physical punishment during past week |
| Child is taken to grocery store at least once/week |  | Child is taken to grocery store at least once/week |
| Father provides some care daily |  | Father provides some care daily |
| Stroller or walker, kiddie car, scooter, or tricycle available |  | Child has access to stroller or walker, kiddie car, scooter, or tricycle |
| Child gets out of house at least four times/week (12m) |  | Child gets out of house |
| Substitute care is provided by one of three regular substitutes |  | Child has access to substitute care |
| Child’s play environment is safe |  | Child’s play environment is safe |
| Child has three or more books of his or her own |  | Child has access to books of his or her own |
| Parent reads stories to child at least three times weekly |  | Parent reads or tells stories (including religious, moral, and ethical scripts) to the child |
| Family visits with relatives or friends once a month or so |  | Family visits with relatives or friends |
| at least 10 books are present and visible |  | at least 10 books are present and visible |
| family has a pet |  | family has a pet |
| Parent spontaneously vocalizes to child twice |  | Parent spontaneously vocalizes to the child |
| Muscle activity toys or equipment available |  | Child has access has to muscle activity toys or equipment |
| Parent spontaneously praises child at least twice during visit |  | Parent spontaneously praises child |
| Parent tells child name of object/person during visit in “teaching style” |  | Parent tells child name of object/person in “teaching style” |
| Parent responds verbally to child’s verbalizations |  | Parent responds verbally to child’s verbalizations |
| Parent caresses/kisses/hugs child at least once during visit |  | Parent caresses/kisses/hugs child |
| Parent’s speech is distinct and audible |  | Parent’s speech is distinct and audible |
| Parent invests maturing toys with value via personal attention |  | Parent invests maturing toys with value via personal attention |
| Parent keeps child in visual range, looks at often |  | Parent keeps child in visual range, looks at often |
| Parent structures child’s play periods |  | Parent structures child’s play periods |
| Parent provides toys that challenge child to develop new skills |  | Parent provides toys that challenge child to develop new skills |
| Simple eye-hand coordination toys |  | Child has access to eye-hand coordination toys |
| Parent talks to child while doing household work |  | Parent talks to child while doing household work |
| Parent does not scold or criticize child during visit |  | Parent does not scold or criticize child |
| Parent does not interfere or restrict child more than three times during visit |  | Parent does not interfere or restrict child |
| Parent does not express annoyance with or hostility to child |  | Parent does not express annoyance with or hostility to child |
| Learning equipment appropriate to age (cuddly or role-playing toys) |  | Child has access to learning equipment appropriate to age (cuddly or role-playing toys) |
| Parent does not shout at child during visit |  | Parent does not shout at child |
| Child is taken regularly to doctor’s office or clinic |  | Child is taken regularly to doctor’s office or clinic |
| Learning facilitators—mobile table and chairs, high chair, play pen |  | Child has access to learning facilitators—mobile table and chairs, high chair, play pen, toys for literature and music |
| Child eats at least one meal per day with mother and father |  | Child eats with mother and father |
| Child has a special place for toys and treasures |  | Child gets a special place for toys or play materials |
