# Supplementary material for: The Amharic version Infant-Toddler Home Observation for Measurement of the Environment (IT-HOME) tool validation
Source: Research Square preprint supplement (doi:10.21203/rs.3.rs-7426769/v1), 2025-12-19
Supplement: Supplementary file 4 [file 981a2665452a090a1c710465.docx]

**Annex IV: Amharic version**

| **ንዑስ መለኪያዎችና ጥያቄዎች/አመላካቾች** | |
| --- | --- |
| **የስሜትና የንግግር ምላሽ** | |
| 19 | ወላጅ በተነሳሽነት ለልጅ ድምፅ ያሰማል |
| 22 | ወላጅ ለልጅ ንግግር/ድምፅ በንግግር መልስ ይሰጣል |
| 21 | ወላጅ ለልጅ የእቃ/የሰው ስም “በማስተማር ዘይቤ” ይነግራል |
| 23 | ልጅ ይሳማል/ ይታቀፋል/ እንክብካቤ ይደረግ(ለ/ላ)ታል |
| **ተስማሚ የመጫዎቻ ቁሳቁሶችን ማቅረብ** | |
| 2 | ል(ጁ)ጅቷ የጡንቻ እንቅስቃሴ መጫወቻዎች/መሳሪያዎች ያገኛል/ታገኛለች (ዥዋዝዌ፥እየተንቀሳቀሱ/እየዘለሉ/እየሮጡ፥ ሰኞ ማክሰኞ የመሳሰሉት መጫዎቻ/ጨዋታዎችን ሊያጠቃልል ይችላል) |
| 1 | እየተገፋ/እየተንሸራተቱ መጫዎቻ ጋሪ/መራመጃ/የልጅ ብስክሌት ያገኛል/ታገኛለች |
| 4 | ለዕድሜ ተስማሚ የሆኑ የመማሪያ መሳሪያዎች (ለምሳሌ የሚታቀፉ አሻንጉሊቶች) ያገኛል/ታገኛለች |
| 7 | የመማሪያ ግብዓቶች-ተንቀሳቃሽ ጠረጴዛና ወንበሮች፥ የመጫወቻ የጽሑፍና ሙዚቃ መጫወቻዎች ወዘተ ያገኛል/ታገኛለች |
| 3 | የዓይን-እጅ ማስተባበሪያ መጫወቻዎች አሉ እን(ዲያገ/ድታ)ኝ ይደረጋል (የሚደረደሩ ኮርኪዎች፥ እቃቃዎች፥ብዬች ሊሆኑ ይችላሉ) |
| **ክልከላና ቅጣትን ማስወገድ// መቀበል** | |
| 41 | ወላጅ በልጁ ላይ አይጮኽም |
| 34 | ወላጅ ልጁን አይሰድብም/ አይነቅፍም |
| 36 | ወላጅ በልጁ ጉዳይ ጣልቃ አይገባም/አይከለክልም |
| **ከልጁ ጋር የወላጆች ተሳትፎ** | |
| 26 | ወላጅ ልጁን በእይታ ይከታተላል/ ይመለከታል |
| 27 | ወላጅ የልጁን የጨዋታ ጊዜ ሰሌዳዎች ያዘጋጃል/ይወስናል |
| 28 | ወላጅ ልጅ አዳዲስ ክህሎቶችን እንዲያዳብር የሚያስችሉ መጫወቻዎች ያቀርባል |
| **መኖሪያና መጫዎቻ ከባቢ ሁነት** | |
| 11 | ለል(ጁ)ጅቷ ተተኪ ተንከባካቢ ያገኛል/ታገኛለች (የቅርብ ቤተሰቦች/ ዘመዶች /እንክብካቤ የህፃናት ሞቆያ ማዕከላትን ያጠቃልላል) |
| 10 | ል(ጁ)ጅቷ ከቤት/ጊቢ ይወጣል/ትወጣለች |
| 9 | ል(ጁ)ጅቷ ለአሻንጉሊቶችና ለመጫዎቻ ዕቃዎች የተለየ ማስቀመጫ ቦታ ያገኛል/ታገኛለች |
| 12 | የል(ጁ)ጅቷ መጫወቻ ከባቢ ደህንነቱ የተጠበቀ ነው |
| **የተለያዩ የእለት-ተ’ለት መነቃቂያ እድሎች** | |
| 15 | ወላጅ ተረት ተረቶችን፥ታሪኮችን/ የሃይማኖት ትምህርቶችን፥ማንኛውንም ንባብ ለልጁ ያነባል/ይነግራል |
| 16 | በወር አንድ ጊዜ ከዘመዶች/ከጓደኞች ጋር የቤተሰብ ጉብኝት ይደረጋል |
| 14 | ል(ጁ)ጅቷ የራሱ/ሷ መጻሕፍት አ(ለው)ላት /ያገኛል/ታገኛለች |

**Its English version**

| S/N | **Factors** | **Item no.** | **Items** |
| --- | --- | --- | --- |
| 1 | Responsivity | Q19 | Parent spontaneously vocalizes to the child |
| Q22 | Parent responds verbally to child’s verbalizations |
| Q21 | Parent tells child name of object/person during visit in “teaching style” |
| Q23 | Parent caresses/kisses/hugs child |
| 2 | Learning materials | Q2 | The child access has to muscle activity toys or equipment |
| Q1 | The child has access to stroller or walker, kiddie car, scooter, or tricycle available |
| Q4 | The child has access to learning equipment appropriate to age (cuddly or role-playing toys) |
| Q7 | The child has access to learning facilitators—mobile table and chairs, high chair, play pen, toys for literature and music |
| Q3 | The child has access to eye-hand coordination toys |
| 3 | Restriction avoidance | Q41 | Parent does not shout at child during visit |
| Q34 | Parent does not scold or criticize child |
| Q36 | Parent does not interfere or restrict child |
| 4 | Involvement | Q26 | Parent keeps child in visual range |
| Q27 | Parent structures child’s play periods |
| Q28 | Parent provides toys that challenge child to develop new skills |
| 5 | Environmental organization | Q11 | The child has access to substitute care |
| Q10 | Child gets out of house |
| Q9 | Child gets a special place for toys or play materials |
| Q12 | Child’s play environment is safe |
| 6 | Stimulation variety | Q15 | Parent reads stories (including religious readings) to child |
| Q16 | Family visits with relatives or friends |
| Q14 | Child has access to books of his or her own |
